# Supplementary material
Source: HighWire-hosted journal article supplement (https://bmjopenquality.bmj.com/content/5/1/u209552.w4190)
Supplement: inline-supplementary-material-2 [file inline-supplementary-material-2.xls]

## Sheet: Pre-Intervention Survey
Table 1.	Do you find that the time it takes to navigate patient notes to locate the current admission delays the ward round?
	Yes (%)	75.86	No (%)	24.14
	Yes (n)	22	No (n)	7
Table 2.	Do you find the current diagnosis, investigative and management plans unclear especially when assessing a patient whilst on call/weekend/nights?
	Yes (%)	76	No (%)	24
	Yes (n)	19	No (n)	6
Table 3.	Is it always clear what the weekend plan for a patient is?
	Yes (%)	4	No (%)	28	Sometimes (%)	68
	Yes (n)	1	No (n)	7	Sometimes (n)	17
Table 4.	Do you always know what jobs including investigations, bloods etc. that need to be chased for patients on a weekend?
	Yes (%)	0	No (%)	50	Sometimes (%)	50
	Yes (n)	0	No (n)	12	Sometimes (n)	12
Table 5.	Do you thinkit would be beneficial to have a standard weekend summary sheet in front of the notes with specific categories containing the patient diagnosis, escalation status, resuscitation status, plan and sections to document the weekend ward round would improve the service provided and save time?
	Yes (%)	79.17	No (%)	12.5	Maybe (%)	8.33
	Yes (n)	19	No (n)	3	Maybe (n)	2
Table 6.	Please state your grade:		% (n)
	Consultant		25 (6)
	Registrar		20.83 (5)
	Core Trainee		20.83 (5)
	FY1		20.83 (5)
	Nursing Staff		12.5 (3)

## Sheet: PDSA1
Table 7.	Have you used the General Surgery Weekend Handover Sheet?
	Yes (%)	100	No (%)	0
	Yes (n)	5	No (n)	0
Table 8.	Was the patient summary and management plan clear on the sheet?
	Yes (%)	0	No (%)	0	Sometimes (%)	100
	Yes (n)	0	No (n)	0	Sometimes (n)	5
Table 9.	Was the sheet easy to use and complete?
	Yes (%)	60	No (%)	40
	Yes (n)	3	No (n)	2
Table 10.	Did it make the ward round quicker and more effiecient?
	Yes (%)	100	No (%)	0
	Yes (n)	5	No (n)	0
Table 11.	Was it easier to review patients outside of the ward round (e.g. those requiring review after becoming unwell or when updating results or answering queries)?
	Yes (%)	80	No (%)	20
	Yes (n)	4	No (n)	1
Table 12.	Do you think the General Surgery Weekend Handover sheet is useful?
	Yes (%)	100	No (%)	0
	Yes (n)	5	No (n)	0
Table 13.	Would you like to see the General Surgery Weekend Handover sheet permanently introduced?
	Yes (%)	100	No (%)	0
	Yes (n)	5	No (n)	0
Table 14.	Please state your grade:		% (n)
	Consultant		20 (1)
	Registrar		40 (2)
	Core Trainee		20 (1)
	FY1		20 (1)
	Nursing staff		0 (0)
	Other		0 (0)

## Sheet: PDSA2 Post-Intervention Survey
Table 15.	Have you used the Weekend Out Of hours Surgical Handover Sheet
	Yes (%)	86.67	No (%)	13.33
	Yes (n)	13	No (n)	2
Table 16.	Was the patient summary and management plan clear on the sheet?
	Yes (%)	60	No (%)	0	Sometimes (%)	40
	Yes (n)	9	No (n)	0	Sometimes (n)	6
										Yes	No	Sometimes
Table 17.	Was the sheet easy to use and complete?							Long time to navigate notes?	Pre-intervention	75.86	24.14	0
	Yes (%)	93.33	No (%)	6.67					Post-intervention	0	100	0
	Yes (n)	14	No (n)	1				Summary of inpatient management plans unclear?	Pre-intervention	76	24	0
									Post-intervention	6.67	93.3	0
Table 18.	Did it make the ward round quicker and more effiecient?							Weekend plan clear?	Pre-intervention	4	28	68
	Yes (%)	100	No (%)	0					Post-intervention	60	0	40
	Yes (n)	14	No (n)	0
Table 19.	Was it easier to review patients outside of the ward round (e.g. those requiring review after becoming unwell or when updating results or answering queries)?
	Yes (%)	93.33	No (%)	6.67
	Yes (n)	14	No (n)	1
Table 20.	Do you think the WOOSH sheet is useful?
	Yes (%)	100	No (%)	0
	Yes (n)	15	No (n)	0
Table 21.	Would you like to see the WOOSH sheet permanently introduced?
	Yes (%)	93.33	No (%)	6.67
	Yes (n)	14	No (n)	1
Table 22.	Please state your grade:		% (n)
	Consultant		15.38 (2)
	Registrar		15.38 (2)
	Core Trainee		7.69 (1)
	FY1		38.46 (5)
	Nursing staff		7.69 (1)
	Other		15.38 (2)

## Sheet: Notes Audit 
Notes	Date of admission	Responsible Consultant	Current Diagnosis	Initial treatment	Current Issues	Weekend Plan	Weekend Bloods	Escalation Status	Resuscitation Status	TTO complete	Doctor 1 time to allocate iformation (Seconds)	Doctor 2 time to allocate information (Seconds)	Average Time (seconds)
1	1	1	1	1	1	1	0	0	0	0	113	148	130.5
2	1	1	1	1	1	1	0	0	0	0	130	90	110
3	1	1	1	1	1	1	0	0	0	0	99	114	106.5
4	1	1	1	1	1	1	0	0	0	0	65	205	135
5	1	1	1	1	1	1	1	1	0	0	185	117	151
Total	5	5	5	5	5	5	1	1	0	0		Average time	126.6
